# Supplementary material
Source: Springer Nature journal article supplement (https://www.springermedizin.de/resource/supplementary/12935_2012_345_MOESM15_ESM.pdf/9540332)

PTK2/G3PDH ratio (x10<sup>-4</sup>)

(a)

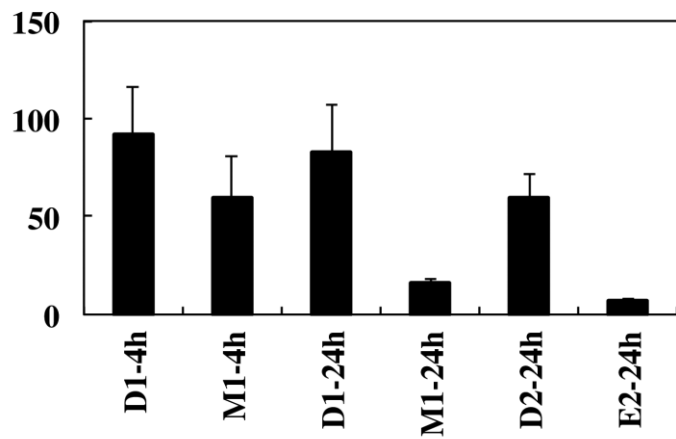

AKT3/G3PDH ratio (x10<sup>-5</sup>)

(b)

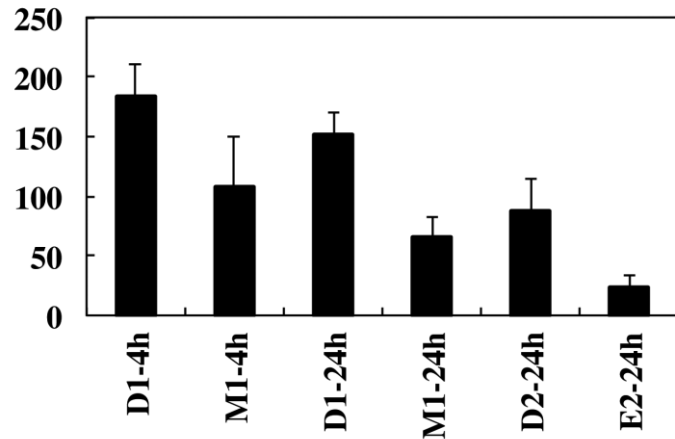

GSK3B/G3PDH ratio (x10<sup>-4</sup>)

(c)

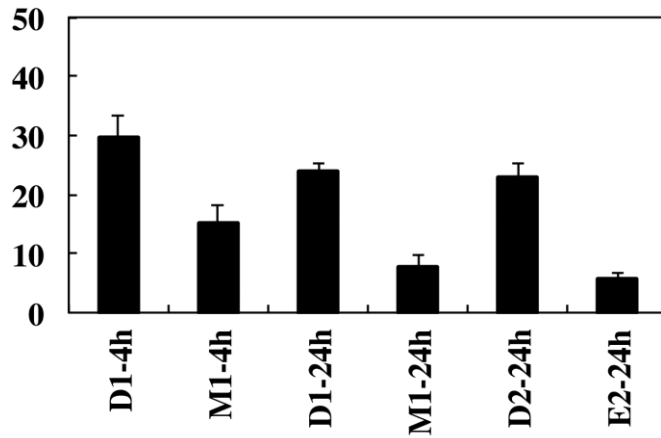

CDC25A/G3PDH ratio (x10<sup>-4</sup>)

(d)

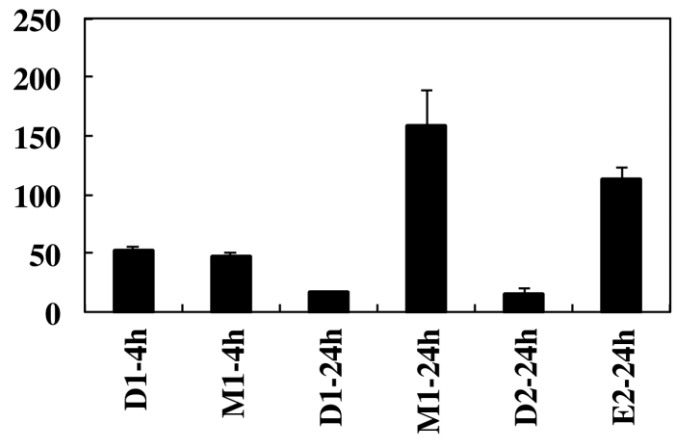

Supplement: MOESM15 [file 9540332]
